# Supplementary material
Source: PubMed Central journal article supplement (PMC11027604)
Supplement: 262_2020_2581_MOESM1_ESM.pdf [file 262_2020_2581_MOESM1_ESM.pdf]

|                       | Course 1      | Course 2      | Course 3      | Course 4      | Course 5      |
|-----------------------|---------------|---------------|---------------|---------------|---------------|
| Time (days)           | 0-24          | 24-52         | 58-80         | 80-104        | 109-136       |
| Dinutuximab           | $\alpha$ -GD2 |
| Immunomodulator       | GM-CSF        | IL-2          | GM-CSF        | IL-2          | GM-CSF        |
| Differentiation agent | cisRA         | cisRA         | cisRA         | cisRA         | cisRA         |

Courses 1, 3, 5

|               | 0 | 1 | 2 | 3 | 4 | 5 | 6 | 7 | 8 | 9 | 10-13 | 24 |
|---------------|---|---|---|---|---|---|---|---|---|---|-------|----|
| GM-CSF        |   |   |   |   |   |   |   |   |   |   |       |    |
| $\alpha$ -GD2 |   |   |   |   |   |   |   |   |   |   |       |    |
| cisRA         |   |   |   |   |   |   |   |   |   |   |       |    |

Courses 2, 4

|               | 0 | 1 | 2 | 3 | 4-6 | 7 | 8 | 9 | 10 | 11-13 | 14-27 | 28 |
|---------------|---|---|---|---|-----|---|---|---|----|-------|-------|----|
| IL-2          |   |   |   |   |     |   |   |   |    |       |       |    |
| $\alpha$ -GD2 |   |   |   |   |     |   |   |   |    |       |       |    |
| cisRA         |   |   |   |   |     |   |   |   |    |       |       |    |

 Blood samples
