# Supplementary material
Source: PubMed Central journal article supplement (PMC11027604)

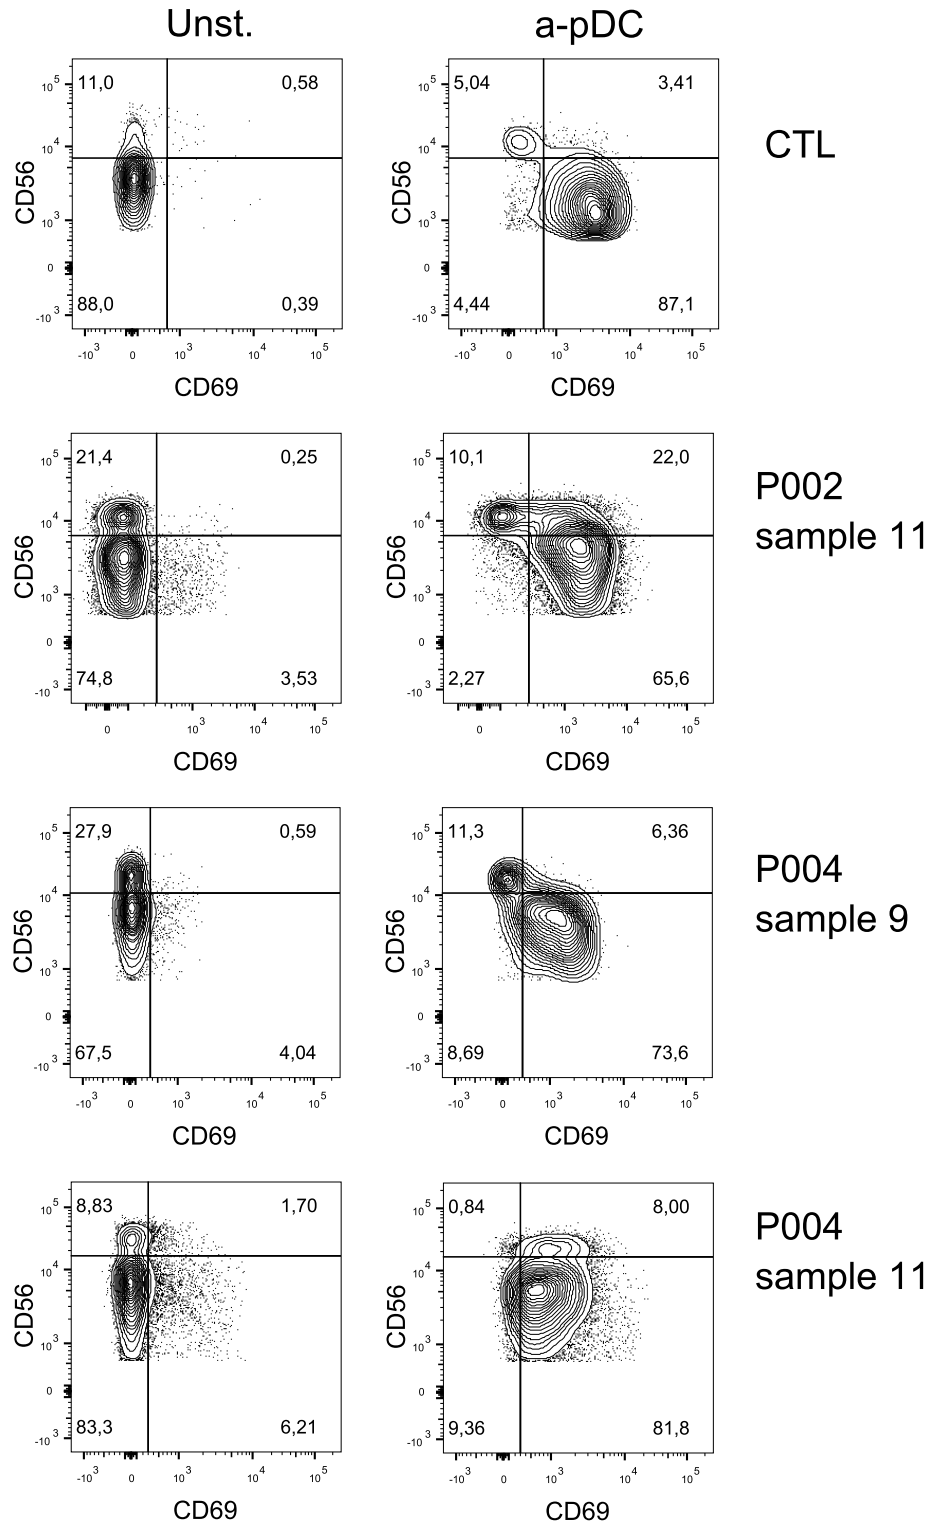

Supplement: 262_2020_2581_MOESM3_ESM.pdf [file 262_2020_2581_MOESM3_ESM.pdf]
